# Supplementary material for: Psychometric Examination of the Body, Eating, and Exercise Comparison Orientation Measure (BEECOM) among Spanish Adolescents and Young Adults
Source: MDPI journal article supplement (doi:10.3390/nu15030626), 2023-01-26
Supplement: s1 [file s1]

## **Psychometric Examination of the Body, Eating, and Exercise Comparison Orientation Measure (BEECOM) among Spanish Adolescents and Young Adults**

- Table S1: Results of moderation analyses examining the conditional effects of BEECOM scores on overall eating disorders symptoms
- Table S2: Results of moderation analyses examining the conditional effects of BEECOM scores on weight and shape concerns
- Table S3: Results of moderation analyses examining the conditional effects of BEECOM scores on dietary restraint

Table S1

*Results of Moderation Analyses Examining the Conditional Effects of BEECOM Scores on Overall Eating Disorders Symptoms*

| Independent variables                              | BEECOM-L            |               |                  |              |              |             |              |             |                     | BEECOM-S      |                  |              |              |       |             |      |              |     |
|----------------------------------------------------|---------------------|---------------|------------------|--------------|--------------|-------------|--------------|-------------|---------------------|---------------|------------------|--------------|--------------|-------|-------------|------|--------------|-----|
|                                                    | $\beta$ (SE)        | $t$           | $p$              | LLCI         | ULCI         | $R^2$       | Interaction  |             | $\beta$ (SE)        | $t$           | $p$              | LLCI         | ULCI         | $R^2$ | Interaction |      | $\Delta R^2$ | $p$ |
|                                                    |                     |               |                  |              |              |             | $\Delta R^2$ | $p$         |                     |               |                  |              |              |       |             |      |              |     |
| Model 1                                            |                     |               |                  |              |              | <b>.451</b> | <b>.005</b>  | <b>.046</b> |                     |               |                  |              |              | .438  | .004        | .074 |              |     |
| Constant                                           | <b>.723 (.026)</b>  | <b>27.906</b> | <b>&lt; .001</b> | <b>.673</b>  | <b>.774</b>  |             |              |             | <b>.724 (.026)</b>  | <b>27.360</b> | <b>&lt; .001</b> | <b>.672</b>  | <b>.776</b>  |       |             |      |              |     |
| Percentile-BMI                                     | <b>.128 (.013)</b>  | <b>10.036</b> | <b>&lt; .001</b> | <b>.103</b>  | <b>.154</b>  |             |              |             | <b>.131 (.013)</b>  | <b>10.161</b> | <b>&lt; .001</b> | <b>.106</b>  | <b>.157</b>  |       |             |      |              |     |
| PACS-R                                             | <b>.044 (.021)</b>  | <b>2.148</b>  | <b>.032</b>      | <b>.004</b>  | <b>.084</b>  |             |              |             | <b>.053 (.021)</b>  | <b>2.547</b>  | <b>.011</b>      | <b>.012</b>  | <b>.094</b>  |       |             |      |              |     |
| BEECOM (Total)                                     | <b>.375 (.032)</b>  | <b>11.802</b> | <b>&lt; .001</b> | <b>.313</b>  | <b>.437</b>  |             |              |             | <b>.362 (.033)</b>  | <b>11.049</b> | <b>&lt; .001</b> | <b>.298</b>  | <b>.426</b>  |       |             |      |              |     |
| Younger males vs Younger females (D <sub>1</sub> ) | <b>-.115 (.040)</b> | <b>-2.858</b> | <b>.004</b>      | <b>-.194</b> | <b>-.036</b> |             |              |             | <b>-.125 (.041)</b> | <b>-3.092</b> | <b>.002</b>      | <b>-.205</b> | <b>-.046</b> |       |             |      |              |     |
| Older females vs Younger females (D <sub>2</sub> ) | <b>-.137 (.033)</b> | <b>-4.122</b> | <b>&lt; .001</b> | <b>-.202</b> | <b>-.072</b> |             |              |             | <b>-.131 (.034)</b> | <b>-3.876</b> | <b>&lt; .001</b> | <b>-.197</b> | <b>-.065</b> |       |             |      |              |     |
| Older males vs Younger females (D <sub>3</sub> )   | <b>-.188 (.036)</b> | <b>-5.164</b> | <b>&lt; .001</b> | <b>-.259</b> | <b>-.116</b> |             |              |             | <b>-.192 (.037)</b> | <b>-5.237</b> | <b>&lt; .001</b> | <b>-.264</b> | <b>-.120</b> |       |             |      |              |     |
| BEECOM (Total) x D <sub>1</sub>                    | -.047 (.042)        | -1.102        | .271             | -.129        | .036         |             |              |             | -.065 (.042)        | -1.554        | .121             | -.147        | .017         |       |             |      |              |     |
| BEECOM (Total) x D <sub>2</sub>                    | <b>-.095 (.037)</b> | <b>-2.555</b> | <b>.011</b>      | <b>-.168</b> | <b>-.022</b> |             |              |             | <b>-.089 (.038)</b> | <b>-2.365</b> | <b>.018</b>      | <b>-.163</b> | <b>-.015</b> |       |             |      |              |     |
| BEECOM (Total) x D <sub>3</sub>                    | <b>-.100 (.047)</b> | <b>-2.129</b> | <b>.033</b>      | <b>-.191</b> | <b>-.008</b> |             |              |             | <b>-.099 (.049)</b> | <b>-2.028</b> | <b>.043</b>      | <b>-.195</b> | <b>-.003</b> |       |             |      |              |     |
| Model 2                                            |                     |               |                  |              |              | .456        | .004         | .065        |                     |               |                  |              |              | .444  | .003        | .159 |              |     |
| Constant                                           | <b>.711 (.025)</b>  | <b>27.980</b> | <b>&lt; .001</b> | <b>.661</b>  | <b>.760</b>  |             |              |             | <b>.710 (.026)</b>  | <b>27.566</b> | <b>&lt; .001</b> | <b>.660</b>  | <b>.761</b>  |       |             |      |              |     |
| Percentile-BMI                                     | <b>.127 (.013)</b>  | <b>9.775</b>  | <b>&lt; .001</b> | <b>.101</b>  | <b>.152</b>  |             |              |             | <b>.132 (.013)</b>  | <b>10.162</b> | <b>&lt; .001</b> | <b>.106</b>  | <b>.157</b>  |       |             |      |              |     |
| PACS-R                                             | .031 (.022)         | 1.418         | .156             | -.012        | .074         |             |              |             | .042 (.021)         | 1.934         | .053             | -.001        | .084         |       |             |      |              |     |
| BEECOM (Body)                                      | <b>.232 (.034)</b>  | <b>6.916</b>  | <b>&lt; .001</b> | <b>.166</b>  | <b>.298</b>  |             |              |             | <b>.212 (.032)</b>  | <b>6.541</b>  | <b>&lt; .001</b> | <b>.148</b>  | <b>.275</b>  |       |             |      |              |     |
| BEECOM (Eating)                                    | <b>.136 (.024)</b>  | <b>5.577</b>  | <b>&lt; .001</b> | <b>.088</b>  | <b>.184</b>  |             |              |             | <b>.153 (.022)</b>  | <b>6.833</b>  | <b>&lt; .001</b> | <b>.109</b>  | <b>.197</b>  |       |             |      |              |     |
| BEECOM (Exercise)                                  | -.044 (.023)        | 1.911         | .056             | -.001        | .090         |             |              |             | .030 (.020)         | 1.538         | .124             | -.008        | .069         |       |             |      |              |     |
| Younger males vs Younger females (D <sub>1</sub> ) | <b>-.084 (.041)</b> | <b>-2.043</b> | <b>.041</b>      | <b>-.165</b> | <b>-.003</b> |             |              |             | <b>-.102 (.041)</b> | <b>-2.510</b> | <b>.012</b>      | <b>-.182</b> | <b>-.022</b> |       |             |      |              |     |
| Older females vs Younger females (D <sub>2</sub> ) | <b>-.136 (.033)</b> | <b>-4.132</b> | <b>&lt; .001</b> | <b>-.200</b> | <b>-.071</b> |             |              |             | <b>-.127 (.033)</b> | <b>-3.848</b> | <b>&lt; .001</b> | <b>-.192</b> | <b>-.062</b> |       |             |      |              |     |
| Older males vs Younger females (D <sub>3</sub> )   | <b>-.163 (.037)</b> | <b>-4.400</b> | <b>&lt; .001</b> | <b>-.236</b> | <b>-.090</b> |             |              |             | <b>-.165 (.037)</b> | <b>-4.439</b> | <b>&lt; .001</b> | <b>-.239</b> | <b>-.092</b> |       |             |      |              |     |
| BEECOM (Body) x D <sub>1</sub>                     | -.032 (.043)        | -0.744        | .457             | -.117        | .053         |             |              |             | -.038 (.042)        | -0.908        | .364             | -.121        | .044         |       |             |      |              |     |
| BEECOM (Body) x D <sub>2</sub>                     | <b>-.092 (.035)</b> | <b>-2.633</b> | <b>.009</b>      | <b>-.160</b> | <b>-.023</b> |             |              |             | <b>-.080 (.036)</b> | <b>-2.233</b> | <b>.026</b>      | <b>-.150</b> | <b>-.010</b> |       |             |      |              |     |
| BEECOM (Body) x D <sub>3</sub>                     | -.062 (.043)        | -1.427        | .154             | -.146        | 0.23         |             |              |             | -.058 (.045)        | -1.311        | .190             | -.146        | .029         |       |             |      |              |     |
| Model 3                                            |                     |               |                  |              |              | <b>.458</b> | <b>.006</b>  | <b>.043</b> |                     |               |                  |              |              | .446  | .005        | .076 |              |     |
| Constant                                           | <b>.718 (.027)</b>  | <b>26.933</b> | <b>&lt; .001</b> | <b>.666</b>  | <b>.771</b>  |             |              |             | <b>.719 (.027)</b>  | <b>26.671</b> | <b>&lt; .001</b> | <b>.666</b>  | <b>.772</b>  |       |             |      |              |     |
| Percentile-BMI                                     | <b>.127 (.013)</b>  | <b>9.805</b>  | <b>&lt; .001</b> | <b>.101</b>  | <b>.152</b>  |             |              |             | <b>.131 (.013)</b>  | <b>10.168</b> | <b>&lt; .001</b> | <b>.106</b>  | <b>.157</b>  |       |             |      |              |     |

|                                                    |                      |               |                  |              |              |                     |               |                  |              |                |
|----------------------------------------------------|----------------------|---------------|------------------|--------------|--------------|---------------------|---------------|------------------|--------------|----------------|
| PACS-R                                             | .029 (.022)          | 1.308         | .191             | -.014        | .071         | .038 (.022)         | 1.782         | .075             | -.004        | .081           |
| BEECOM (Body)                                      | <b>.178 (.025)</b>   | <b>7.003</b>  | <b>&lt; .001</b> | <b>.128</b>  | <b>.228</b>  | <b>.165 (.023)</b>  | <b>7.323</b>  | <b>&lt; .001</b> | <b>.121</b>  | <b>.210</b>    |
| BEECOM (Eating)                                    | <b>.191 (.036)</b>   | <b>5.272</b>  | <b>&lt; .001</b> | <b>.120</b>  | <b>.262</b>  | <b>.218 (.036)</b>  | <b>6.028</b>  | <b>&lt; .001</b> | <b>.147</b>  | <b>.289</b>    |
| BEECOM (Exercise)                                  | <b>.045 (.023)</b>   | <b>1.982</b>  | <b>.048</b>      | <b>.000</b>  | <b>.090</b>  | .030 (.020)         | 1.552         | .121             | -.008        | .069           |
| Younger males vs Younger females (D <sub>1</sub> ) | <b>-.088 (.0419)</b> | <b>-2.155</b> | <b>.031</b>      | <b>-.169</b> | <b>-.008</b> | <b>-.110 (.040)</b> | <b>-2.748</b> | <b>.006</b>      | <b>-.189</b> | <b>-.032</b>   |
| Older females vs Younger females (D <sub>2</sub> ) | <b>-.148 (.034)</b>  | <b>-4.330</b> | <b>&lt; .001</b> | <b>-.215</b> | <b>-.081</b> | <b>-.139 (.034)</b> | <b>-4.022</b> | <b>&lt; .001</b> | <b>-.206</b> | <b>-.071</b>   |
| Older males vs Younger females (D <sub>3</sub> )   | <b>-.168 (.037)</b>  | <b>-4.580</b> | <b>&lt; .001</b> | <b>-.240</b> | <b>-.096</b> | <b>-.171 (.037)</b> | <b>-4.632</b> | <b>&lt; .001</b> | <b>-.244</b> | <b>-.099</b>   |
| BEECOM (Eating) x D <sub>1</sub>                   | -.010 (.047)         | -0.202        | .840             | -.102        | .083         | -.050 (.046)        | -1.105        | .270             | -.140        | .039           |
| BEECOM (Eating) x D <sub>2</sub>                   | <b>-.086 (.039)</b>  | <b>-2.208</b> | <b>.027</b>      | <b>-.162</b> | <b>-.010</b> | <b>-.098 (.040)</b> | <b>-2.437</b> | <b>.015</b>      | <b>-.176</b> | <b>-.019</b>   |
| BEECOM (Eating) x D <sub>3</sub>                   | <b>-.103 (.046)</b>  | <b>-2.212</b> | <b>.027</b>      | <b>-.194</b> | <b>-.012</b> | <b>-.096 (.049)</b> | <b>-1.958</b> | <b>.051</b>      | <b>-.193</b> | <b>.000</b>    |
| Model 4                                            |                      |               |                  |              |              | .456                | .004          | .090             |              | .446 .004 .071 |
| Constant                                           | <b>.720 (.027)</b>   | <b>27.082</b> | <b>&lt; .001</b> | <b>.668</b>  | <b>.772</b>  | <b>.720 (.027)</b>  | <b>26.930</b> | <b>&lt; .001</b> | <b>.668</b>  | <b>.773</b>    |
| Percentile-BMI                                     | <b>.126 (.013)</b>   | <b>9.730</b>  | <b>&lt; .001</b> | <b>.100</b>  | <b>.151</b>  | <b>.130 (.013)</b>  | <b>10.039</b> | <b>&lt; .001</b> | <b>.105</b>  | <b>.155</b>    |
| PACS-R                                             | .028 (.022)          | 1.268         | .205             | -.015        | .070         | .038 (.022)         | 1.788         | .074             | -.004        | .081           |
| BEECOM (Body)                                      | <b>.178 (.026)</b>   | <b>6.956</b>  | <b>&lt; .001</b> | <b>.128</b>  | <b>.228</b>  | <b>.164 (.023)</b>  | <b>7.294</b>  | <b>&lt; .001</b> | <b>.120</b>  | <b>.209</b>    |
| BEECOM (Eating)                                    | <b>.135 (.024)</b>   | <b>5.516</b>  | <b>&lt; .001</b> | <b>.087</b>  | <b>.182</b>  | <b>.151 (.022)</b>  | <b>6.817</b>  | <b>&lt; .001</b> | <b>.108</b>  | <b>.195</b>    |
| BEECOM (Exercise)                                  | <b>.113 (.036)</b>   | <b>3.147</b>  | <b>.002</b>      | <b>.042</b>  | <b>.183</b>  | <b>.100 (.032)</b>  | <b>3.108</b>  | <b>.002</b>      | <b>.037</b>  | <b>.163</b>    |
| Younger males vs Younger females (D <sub>1</sub> ) | <b>-.100 (.039)</b>  | <b>-2.595</b> | <b>.010</b>      | <b>-.176</b> | <b>-.024</b> | <b>-.117 (.039)</b> | <b>-3.000</b> | <b>.003</b>      | <b>-.193</b> | <b>-.040</b>   |
| Older females vs Younger females (D <sub>2</sub> ) | <b>-.155 (.035)</b>  | <b>-4.444</b> | <b>&lt; .001</b> | <b>-.223</b> | <b>-.087</b> | <b>-.145 (.035)</b> | <b>-4.147</b> | <b>&lt; .001</b> | <b>-.214</b> | <b>-.077</b>   |
| Older males vs Younger females (D <sub>3</sub> )   | <b>-.169 (.036)</b>  | <b>-4.661</b> | <b>&lt; .001</b> | <b>.241</b>  | <b>-.098</b> | <b>-.170 (.036)</b> | <b>4.702</b>  | <b>&lt; .001</b> | <b>-.241</b> | <b>-.099</b>   |
| BEECOM (Exercise) x D <sub>1</sub>                 | -.059 (.0419)        | -1.413        | .158             | -.140        | .023         | <b>-.086 (.040)</b> | <b>-2.119</b> | <b>.034</b>      | <b>-.165</b> | <b>-.006</b>   |
| BEECOM (Exercise) x D <sub>2</sub>                 | <b>-.093 (.040)</b>  | <b>-2.327</b> | <b>.020</b>      | <b>-.172</b> | <b>-.015</b> | <b>-.082 (.039)</b> | <b>-2.117</b> | <b>.034</b>      | <b>-.157</b> | <b>-.006</b>   |
| BEECOM (Exercise) x D <sub>3</sub>                 | <b>-.092 (.045)</b>  | <b>-2.032</b> | <b>.042</b>      | <b>-.181</b> | <b>-.003</b> | <b>-.095 (.044)</b> | <b>-2.172</b> | <b>.030</b>      | <b>-.180</b> | <b>-.009</b>   |

*Note.*  $\beta$  = Standardized regression coefficients; *SE* = Standard error; CI = Confidence interval;  $R^2$  = Explained Variance; ED = Eating Disorders;  $\Delta R^2 = R^2$  increase due to interaction; BEECOM = Body, Eating, and Exercise Comparison Orientation Measure (-L = long version, -S = short version); LLCI, lower limit 95% bootstrap confidence interval; ULCI, upper limit 95% bootstrap confidence interval; PACS-R = Physical Appearance Comparison Scale-Revised.

Table S2

*Results of Moderation Analyses Examining the Conditional Effects of BEECOM Scores on Weight and Shape Concerns*

| Independent variables                              | BEECOM-L     |        |        |       |       |       |                  | BEECOM-S     |        |        |       |       |       |                  |
|----------------------------------------------------|--------------|--------|--------|-------|-------|-------|------------------|--------------|--------|--------|-------|-------|-------|------------------|
|                                                    | $\beta$ (SE) | $t$    | $p$    | LLCI  | ULCI  | $R^2$ | Interaction      | $\beta$ (SE) | $t$    | $p$    | LLCI  | ULCI  | $R^2$ | Interaction      |
|                                                    |              |        |        |       |       |       | $\Delta R^2$ $p$ |              |        |        |       |       |       | $\Delta R^2$ $p$ |
| Model 1                                            |              |        |        |       |       | .407  | .007 .009        |              |        |        |       |       | .396  | .006 .015        |
| Constant                                           | .933 (.040)  | 23.124 | < .001 | .854  | 1.012 |       |                  | .933 (.041)  | 22.904 | < .001 | .853  | 1.013 |       |                  |
| Percentile-BMI                                     | .208 (.019)  | 10.765 | < .001 | .170  | .246  |       |                  | .211 (.019)  | 10.866 | < .001 | .173  | .249  |       |                  |
| PACS-R                                             | .077 (.030)  | 2.559  | .011   | .018  | .135  |       |                  | .090 (.030)  | 2.966  | .003   | .030  | .149  |       |                  |
| BEECOM (Total)                                     | .469 (.045)  | 10.497 | < .001 | .381  | .556  |       |                  | .455 (.046)  | 9.873  | < .001 | .365  | .546  |       |                  |
| Younger males vs Younger females (D <sub>1</sub> ) | -.280 (.058) | -4.839 | < .001 | -.393 | -.166 |       |                  | -.295 (.058) | -5.053 | < .001 | -.409 | -.180 |       |                  |
| Older females vs Younger females (D <sub>2</sub> ) | -.145 (.052) | -2.785 | .005   | -.247 | -.043 |       |                  | -.137 (.053) | -2.605 | .009   | -.240 | -.034 |       |                  |
| Older males vs Younger females (D <sub>3</sub> )   | -.353 (.055) | -6.441 | < .001 | -.461 | -.246 |       |                  | -.357 (.055) | -6.489 | < .001 | -.466 | -.249 |       |                  |
| BEECOM (Total) x D <sub>1</sub>                    | -.072 (.056) | -1.285 | .199   | -.183 | .038  |       |                  | -.108 (.057) | -1.903 | .057   | -.219 | .003  |       |                  |
| BEECOM (Total) x D <sub>2</sub>                    | -.114 (.051) | -2.239 | .025   | -.214 | -.014 |       |                  | -.114 (.052) | -2.197 | .028   | -.216 | -.012 |       |                  |
| BEECOM (Total) x D <sub>3</sub>                    | -.208 (.064) | -.3233 | .001   | -.334 | -.082 |       |                  | -.203 (.067) | -3.052 | .002   | -.334 | -.073 |       |                  |
| Model 2                                            |              |        |        |       |       | .415  | .006 .010        |              |        |        |       |       | .405  | .005 .034        |
| Constant                                           | .909 (.039)  | 23.098 | < .001 | .831  | .986  |       |                  | .908 (.040)  | 22.889 | < .001 | .830  | .986  |       |                  |
| Percentile-BMI                                     | .204 (.019)  | 10.505 | < .001 | .166  | .242  |       |                  | .211 (.019)  | 10.829 | < .001 | .172  | .249  |       |                  |
| PACS-R                                             | .050 (.031)  | 1.598  | .110   | -.011 | .111  |       |                  | .067 (.031)  | 2.179  | .030   | .007  | .127  |       |                  |
| BEECOM (Body)                                      | .361 (.049)  | 7.407  | < .001 | .265  | .456  |       |                  | .331 (.046)  | 7.173  | < .001 | .241  | .422  |       |                  |
| BEECOM (Eating)                                    | .142 (.035)  | 4.064  | < .001 | .074  | .211  |       |                  | .168 (.032)  | 5.222  | < .001 | .105  | .231  |       |                  |
| BEECOM (Exercise)                                  | .033 (.034)  | 0.975  | .330   | -.034 | .100  |       |                  | .015 (.029)  | 0.529  | .597   | -.041 | .072  |       |                  |
| Younger males vs Younger females (D <sub>1</sub> ) | -.221 (.060) | -3.682 | < .001 | -.338 | -.103 |       |                  | -.250 (.059) | -4.237 | < .001 | -.366 | -.134 |       |                  |
| Older females vs Younger females (D <sub>2</sub> ) | -.136 (.051) | -2.655 | .008   | -.237 | -.036 |       |                  | -.126 (.052) | -2.433 | .015   | -.227 | -.024 |       |                  |
| Older males vs Younger females (D <sub>3</sub> )   | -.314 (.056) | -5.618 | < .001 | -.423 | -.204 |       |                  | -.315 (.056) | -5.627 | < .001 | -.425 | -.205 |       |                  |
| BEECOM (Body) x D <sub>1</sub>                     | -.048 (.062) | -0.781 | .435   | -.169 | .073  |       |                  | -.079 (.060) | -1.309 | .191   | -.198 | .040  |       |                  |
| BEECOM (Body) x D <sub>2</sub>                     | -.148 (.051) | -2.926 | .003   | -.247 | -.049 |       |                  | -.136 (.052) | -2.631 | .009   | -.237 | -.035 |       |                  |
| BEECOM (Body) x D <sub>3</sub>                     | -.161 (.064) | -2.529 | .012   | -.285 | -.036 |       |                  | -.149 (.064) | -2.304 | .021   | -.275 | -.022 |       |                  |
| Model 3                                            |              |        |        |       |       | .416  | .007 .009        |              |        |        |       |       | .406  | .006 .036        |
| Constant                                           | .920 (.041)  | 22.632 | < .001 | .841  | 1.000 |       |                  | .922 (.041)  | 22.505 | < .001 | .842  | 1.002 |       |                  |
| Percentile-BMI                                     | .203 (.019)  | 10.472 | < .001 | .165  | .241  |       |                  | .209 (.019)  | 10.752 | < .001 | .171  | .247  |       |                  |

|                                                    |                      |               |                  |              |              |                     |               |                  |              |                       |
|----------------------------------------------------|----------------------|---------------|------------------|--------------|--------------|---------------------|---------------|------------------|--------------|-----------------------|
| PACS-R                                             | .042 (.031)          | 1.330         | .184             | -.020        | .103         | .059 (.031)         | 1.911         | .056             | -.002        | .120                  |
| BEECOM (Body)                                      | <b>.261 (.039)</b>   | <b>6.770</b>  | <b>&lt; .001</b> | <b>.185</b>  | <b>.337</b>  | <b>.238 (.034)</b>  | <b>7.034</b>  | <b>&lt; .001</b> | <b>.171</b>  | <b>.304</b>           |
| BEECOM (Eating)                                    | .040 (.034)          | 1.190         | .234             | -.026        | .106         | .018 (.029)         | 0.633         | .527             | -.038        | .075                  |
| BEECOM (Exercise)                                  | <b>.216 (.052)</b>   | <b>4.161</b>  | <b>&lt; .001</b> | <b>.114</b>  | <b>.317</b>  | <b>.263 (.051)</b>  | <b>5.126</b>  | <b>&lt; .001</b> | <b>.162</b>  | <b>.363</b>           |
| Younger males vs Younger females (D <sub>1</sub> ) | <b>-.237 (.058)</b>  | <b>-4.074</b> | <b>&lt; .001</b> | <b>-.351</b> | <b>-.123</b> | <b>-.268 (.058)</b> | <b>-4.643</b> | <b>&lt; .001</b> | <b>-.381</b> | <b>-.155</b>          |
| Older females vs Younger females (D <sub>2</sub> ) | <b>-.164 (.053)</b>  | <b>-3.090</b> | <b>.002</b>      | <b>-.268</b> | <b>-.060</b> | <b>-.150 (.053)</b> | <b>-2.819</b> | <b>.005</b>      | <b>-.254</b> | <b>-.046</b>          |
| Older males vs Younger females (D <sub>3</sub> )   | <b>-.313 (.055)</b>  | <b>-5.716</b> | <b>&lt; .001</b> | <b>-.421</b> | <b>-.206</b> | <b>-.319 (.055)</b> | <b>-5.772</b> | <b>&lt; .001</b> | <b>-.427</b> | <b>-.210</b>          |
| BEECOM (Eating) x D <sub>1</sub>                   | -.022 (.061)         | -0.358        | .720             | -.141        | .097         | -.091 (.061)        | -1.498        | .134             | -.211        | .028                  |
| BEECOM (Eating) x D <sub>2</sub>                   | -.070 (.054)         | -1.290        | .197             | -.176        | .036         | -.099 (.061)        | -1.769        | .077             | -.209        | .011                  |
| BEECOM (Eating) x D <sub>3</sub>                   | <b>-.204 (.064)</b>  | <b>-3.191</b> | <b>.001</b>      | <b>-.329</b> | <b>-.078</b> | <b>-.193 (.067)</b> | <b>-2.899</b> | <b>.004</b>      | <b>-.324</b> | <b>-.062</b>          |
| Model 4                                            |                      |               |                  |              |              | .413 .004 .065      |               |                  |              | <b>.405 .004 .044</b> |
| Constant                                           | <b>.923 (.040)</b>   | <b>22.928</b> | <b>&lt; .001</b> | <b>.844</b>  | <b>1.002</b> | <b>.923 (.040)</b>  | <b>22.815</b> | <b>&lt; .001</b> | <b>.844</b>  | <b>1.003</b>          |
| Percentile-BMI                                     | <b>.203 (-0.19)</b>  | <b>10.445</b> | <b>&lt; .001</b> | <b>.165</b>  | <b>.241</b>  | <b>.209 (.019)</b>  | <b>10.750</b> | <b>&lt; .001</b> | <b>.170</b>  | <b>.247</b>           |
| PACS-R                                             | .042 (.031)          | 1.350         | .177             | -.019        | .104         | <b>.061 (.031)</b>  | <b>1.988</b>  | <b>.047</b>      | <b>.001</b>  | <b>.122</b>           |
| BEECOM (Body)                                      | <b>.263 (.039)</b>   | <b>6.796</b>  | <b>&lt; .001</b> | .187         | .339         | <b>.238 (.034)</b>  | <b>7.067</b>  | <b>&lt; .001</b> | <b>.172</b>  | <b>.304</b>           |
| BEECOM (Eating)                                    | <b>.141 (.035)</b>   | <b>4.028</b>  | <b>&lt; .001</b> | .072         | .210         | <b>.165 (.032)</b>  | <b>5.210</b>  | <b>&lt; .001</b> | <b>.103</b>  | <b>.228</b>           |
| BEECOM (Exercise)                                  | <b>.129 (.050)</b>   | <b>2.564</b>  | <b>.010</b>      | .030         | .227         | <b>.112 (.045)</b>  | <b>2.455</b>  | <b>.014</b>      | <b>.022</b>  | <b>.201</b>           |
| Younger males vs Younger females (D <sub>1</sub> ) | <b>-.250 (-0.56)</b> | <b>-4.491</b> | <b>&lt; .001</b> | -.360        | -.141        | <b>-.272 (.056)</b> | <b>-4.846</b> | <b>&lt; .001</b> | <b>-.383</b> | <b>-.162</b>          |
| Older females vs Younger females (D <sub>2</sub> ) | <b>-.165 (.053)</b>  | <b>-3.090</b> | <b>.002</b>      | -.270        | -.060        | <b>.152 (.054)</b>  | <b>-2.845</b> | <b>.005</b>      | <b>-.258</b> | <b>-.047</b>          |
| Older males vs Younger females (D <sub>3</sub> )   | <b>-.313 (.054)</b>  | <b>-5.748</b> | <b>&lt; .001</b> | -.420        | -.206        | <b>-.313 (.054)</b> | <b>-5.761</b> | <b>&lt; .001</b> | <b>-.420</b> | <b>-.206</b>          |
| BEECOM (Exercise) x D <sub>1</sub>                 | -.082 (.055)         | -1.506        | .132             | -.190        | .025         | <b>-.114 (.055)</b> | <b>-2.097</b> | <b>.036</b>      | <b>-.222</b> | <b>-.007</b>          |
| BEECOM (Exercise) x D <sub>2</sub>                 | -.103 (.054)         | -1.912        | .056             | -.208        | .003         | -.094 (.053)        | -1.777        | .076             | -.198        | .010                  |
| BEECOM (Exercise) x D <sub>3</sub>                 | <b>-.159 (.062)</b>  | <b>-2.571</b> | <b>.010</b>      | <b>-.280</b> | <b>-.038</b> | <b>-.160 (.060)</b> | <b>-2.662</b> | <b>.008</b>      | <b>-.279</b> | <b>-.042</b>          |

*Note.*  $\beta$  = Standardized regression coefficients; *SE* = Standard error; CI = Confidence interval;  $R^2$  = Explained Variance;  $\Delta R^2$  =  $R^2$  increase due to interaction; ED = Eating Disorders; BEECOM = Body, Eating, and Exercise Comparison Orientation Measure (-L = long version, -S = short version); LLCI, lower limit 95% bootstrap confidence interval; ULCI, upper limit 95% bootstrap confidence interval; PACS-R = Physical Appearance Comparison Scale-Revised.

Table S3

*Results of Moderation Analyses Examining the Conditional Effects of BEECOM Scores on Dietary Restraint*

| Independent variables                              | BEECOM-L            |               |                  |              |              |             |              |             | BEECOM-S            |               |                  |              |              |       |              |      |
|----------------------------------------------------|---------------------|---------------|------------------|--------------|--------------|-------------|--------------|-------------|---------------------|---------------|------------------|--------------|--------------|-------|--------------|------|
|                                                    | $\beta$ (SE)        | $t$           | $p$              | LLCI         | ULCI         | $R^2$       | Interaction  |             | $\beta$ (SE)        | $t$           | $p$              | LLCI         | ULCI         | $R^2$ | Interaction  |      |
|                                                    |                     |               |                  |              |              |             | $\Delta R^2$ | $p$         |                     |               |                  |              |              |       | $\Delta R^2$ | $p$  |
| Model 1                                            |                     |               |                  |              |              | <b>.279</b> | .006         | .061        |                     |               |                  |              |              | .272  | .005         | .116 |
| Constant                                           | <b>.692 (.039)</b>  | <b>17.738</b> | <b>&lt; .001</b> | <b>.616</b>  | <b>.769</b>  |             |              |             | <b>.692 (.040)</b>  | <b>17.394</b> | <b>&lt; .001</b> | <b>.614</b>  | <b>.770</b>  |       |              |      |
| Percentile-BMI                                     | <b>.214 (.019)</b>  | <b>11.181</b> | <b>&lt; .001</b> | <b>.177</b>  | <b>.252</b>  |             |              |             | <b>.217 (.019)</b>  | <b>11.320</b> | <b>&lt; .001</b> | <b>.180</b>  | <b>.255</b>  |       |              |      |
| PACS-R                                             | -.007 (.028)        | -0.235        | .815             | -.062        | .048         |             |              |             | .001 (.028)         | 0.034         | .973             | -.055        | .056         |       |              |      |
| BEECOM (Total)                                     | <b>.397 (.047)</b>  | <b>8.403</b>  | <b>&lt; .001</b> | <b>.304</b>  | <b>.490</b>  |             |              |             | <b>.375 (.049)</b>  | <b>7.693</b>  | <b>&lt; .001</b> | <b>.280</b>  | <b>.471</b>  |       |              |      |
| Younger males vs Younger females (D <sub>1</sub> ) | <b>-.135 (.056)</b> | <b>-2.400</b> | <b>.017</b>      | <b>-.245</b> | <b>-.025</b> |             |              |             | <b>-.141 (.057)</b> | <b>-2.485</b> | <b>.013</b>      | <b>-.251</b> | <b>-.030</b> |       |              |      |
| Older females vs Younger females (D <sub>2</sub> ) | -.078 (.050)        | -1.561        | .119             | -.177        | .020         |             |              |             | -.072 (.051)        | -1.426        | .154             | -.172        | .027         |       |              |      |
| Older males vs Younger females (D <sub>3</sub> )   | <b>-.153 (.054)</b> | <b>-2.847</b> | <b>.004</b>      | <b>-.259</b> | <b>-.048</b> |             |              |             | <b>-.157 (.054)</b> | <b>-2.894</b> | <b>.004</b>      | <b>-.263</b> | <b>-.051</b> |       |              |      |
| BEECOM (Total) x D <sub>1</sub>                    | <b>-.137 (.059)</b> | <b>-2.302</b> | <b>.022</b>      | <b>-.253</b> | <b>-.020</b> |             |              |             | <b>-.131 (.061)</b> | <b>-2.152</b> | <b>.032</b>      | <b>-.250</b> | <b>-.012</b> |       |              |      |
| BEECOM (Total) x D <sub>2</sub>                    | <b>-.120 (.054)</b> | <b>-2.229</b> | <b>.026</b>      | <b>-.225</b> | <b>-.014</b> |             |              |             | -.101 (.055)        | -1.840        | .066             | -.209        | .007         |       |              |      |
| BEECOM (Total) x D <sub>3</sub>                    | <b>-.139 (.065)</b> | <b>-2.122</b> | <b>.034</b>      | <b>-.267</b> | <b>-.010</b> |             |              |             | -.129 (.067)        | -1.919        | .055             | -.260        | .003         |       |              |      |
| Model 2                                            |                     |               |                  |              |              | <b>.284</b> | <b>.006</b>  | <b>.042</b> |                     |               |                  |              |              | .279  | .004         | .134 |
| Constant                                           | <b>.690 (.038)</b>  | <b>18.019</b> | <b>&lt; .001</b> | <b>.615</b>  | <b>.765</b>  |             |              |             | <b>.690 (.039)</b>  | <b>17.818</b> | <b>&lt; .001</b> | <b>.614</b>  | <b>.766</b>  |       |              |      |
| Percentile-BMI                                     | <b>.220 (.019)</b>  | <b>11.379</b> | <b>&lt; .001</b> | <b>.182</b>  | <b>.258</b>  |             |              |             | <b>.225 (.019)</b>  | <b>11.700</b> | <b>&lt; .001</b> | <b>.187</b>  | <b>.262</b>  |       |              |      |
| PACS-R                                             | .017 (.030)         | 0.577         | .564             | -.041        | .075         |             |              |             | .021 (.029)         | 0.723         | .470             | -.036        | .078         |       |              |      |
| BEECOM (Body)                                      | <b>.142 (.048)</b>  | <b>2.959</b>  | <b>.003</b>      | <b>.048</b>  | <b>.236</b>  |             |              |             | <b>.120 (.048)</b>  | <b>2.516</b>  | <b>.012</b>      | <b>.026</b>  | <b>.214</b>  |       |              |      |
| BEECOM (Eating)                                    | <b>.190 (.035)</b>  | <b>5.362</b>  | <b>&lt; .001</b> | <b>.120</b>  | <b>.259</b>  |             |              |             | <b>.204 (.033)</b>  | <b>6.139</b>  | <b>&lt; .001</b> | <b>.139</b>  | <b>.269</b>  |       |              |      |
| BEECOM (Exercise)                                  | .073 (.032)         | 2.271         | .023             | .010         | .137         |             |              |             | .060 (.029)         | 2.053         | .040             | .003         | .118         |       |              |      |
| Younger males vs Younger females (D <sub>1</sub> ) | <b>-.142 (.057)</b> | <b>-2.506</b> | <b>.012</b>      | <b>-.253</b> | <b>-.031</b> |             |              |             | <b>-.152 (.056)</b> | <b>-2.696</b> | <b>.007</b>      | <b>-.263</b> | <b>-.041</b> |       |              |      |
| Older females vs Younger females (D <sub>2</sub> ) | -.070 (.050)        | -1.409        | .159             | -.168        | .028         |             |              |             | -.064 (.050)        | -1.278        | .201             | -.162        | .034         |       |              |      |
| Older males vs Younger females (D <sub>3</sub> )   | -.160 (.054)        | -2.933        | .003             | -.266        | -.053        |             |              |             | -.161 (.054)        | -2.975        | .003             | -.267        | -.055        |       |              |      |
| BEECOM (Body) x D <sub>1</sub>                     | <b>-.147 (.060)</b> | <b>-2.465</b> | <b>.014</b>      | <b>-.265</b> | <b>-.030</b> |             |              |             | <b>-.126 (.059)</b> | <b>-2.132</b> | <b>.033</b>      | <b>-.243</b> | <b>-.010</b> |       |              |      |
| BEECOM (Body) x D <sub>2</sub>                     | <b>-.124 (.050)</b> | <b>-2.500</b> | <b>.013</b>      | <b>-.222</b> | <b>-.027</b> |             |              |             | <b>-.102 (.051)</b> | <b>-1.998</b> | <b>.046</b>      | <b>-.203</b> | <b>-.002</b> |       |              |      |
| BEECOM (Body) x D <sub>3</sub>                     | -.099 (.064)        | -1.552        | .121             | -.224        | .026         |             |              |             | -.084 (.064)        | -1.320        | .187             | -.209        | .041         |       |              |      |
| Model 3                                            |                     |               |                  |              |              | <b>.285</b> | <b>.006</b>  | <b>.008</b> |                     |               |                  |              |              | .281  | .006         | .104 |
| Constant                                           | <b>.703 (.040)</b>  | <b>17.553</b> | <b>&lt; .001</b> | <b>.624</b>  | <b>.782</b>  |             |              |             | <b>.702 (.040)</b>  | <b>17.403</b> | <b>&lt; .001</b> | <b>.623</b>  | <b>.781</b>  |       |              |      |
| Percentile-BMI                                     | <b>.219 (.019)</b>  | <b>11.376</b> | <b>&lt; .001</b> | <b>.181</b>  | <b>.257</b>  |             |              |             | <b>.223 (.019)</b>  | <b>11.680</b> | <b>&lt; .001</b> | <b>.186</b>  | <b>.261</b>  |       |              |      |

|                                                    |                     |               |                  |              |              |                |                     |               |                  |                |              |
|----------------------------------------------------|---------------------|---------------|------------------|--------------|--------------|----------------|---------------------|---------------|------------------|----------------|--------------|
| PACS-R                                             | .013 (.030)         | 0.457         | .648             | -.044        | .071         |                | .017 (.029)         | 0.591         | .555             | -.040          | .074         |
| BEECOM (Body)                                      | .048 (.036)         | 1.335         | .182             | -.022        | .118         |                | .041 (.033)         | 1.268         | .205             | -.023          | .105         |
| BEECOM (Eating)                                    | <b>.282 (.054)</b>  | <b>5.258</b>  | <b>&lt; .001</b> | <b>.177</b>  | <b>.388</b>  |                | <b>.298 (.053)</b>  | <b>5.590</b>  | <b>&lt; .001</b> | <b>.193</b>    | <b>.402</b>  |
| BEECOM (Exercise)                                  | <b>.073 (.032)</b>  | <b>2.261</b>  | <b>.024</b>      | <b>.010</b>  | <b>.137</b>  |                | <b>.060 (.029)</b>  | <b>2.028</b>  | <b>.043</b>      | <b>.002</b>    | <b>.118</b>  |
| Younger males vs Younger females (D <sub>1</sub> ) | <b>-.141 (.058)</b> | <b>-2.446</b> | <b>.015</b>      | <b>-.254</b> | <b>-.028</b> |                | <b>-.155 (.057)</b> | <b>-2.711</b> | <b>.007</b>      | <b>-.267</b>   | <b>-.043</b> |
| Older females vs Younger females (D <sub>2</sub> ) | -.090 (.051)        | -1.774        | .076             | -.190        | .010         |                | -.082 (.051)        | -1.599        | .110             | -.182          | .019         |
| Older males vs Younger females (D <sub>3</sub> )   | <b>-.169 (.055)</b> | <b>-3.094</b> | <b>.002</b>      | <b>-.276</b> | <b>-.062</b> |                | <b>-.171 (.054)</b> | <b>-3.131</b> | <b>.002</b>      | <b>-.277</b>   | <b>-.064</b> |
| BEECOM (Eating) x D <sub>1</sub>                   | -.101 (.063)        | -1.595        | .111             | -.225        | .023         |                | -.116 (.065)        | -1.789        | .074             | -.244          | .011         |
| BEECOM (Eating) x D <sub>2</sub>                   | -.102 (.057)        | -1.792        | .073             | -.213        | .010         |                | -.099 (.058)        | -1.706        | .088             | -.212          | .015         |
| BEECOM (Eating) x D <sub>3</sub>                   | <b>-.173 (.068)</b> | <b>-2.535</b> | <b>.011</b>      | <b>-.308</b> | <b>-.039</b> |                | <b>-.167 (.071)</b> | <b>-2.355</b> | <b>.019</b>      | <b>-.306</b>   | <b>-.028</b> |
| Model 4                                            |                     |               |                  |              |              | .283 .005 .114 |                     |               |                  | .279 .004 .160 |              |
| Constant                                           | <b>.704 (.040)</b>  | <b>17.603</b> | <b>&lt; .001</b> | <b>.626</b>  | <b>.782</b>  |                | <b>.702 (.040)</b>  | <b>17.421</b> | <b>&lt; .001</b> | <b>.623</b>    | <b>.781</b>  |
| Percentile-BMI                                     | <b>.218 (.019)</b>  | <b>11.298</b> | <b>&lt; .001</b> | <b>.180</b>  | <b>.256</b>  |                | <b>.223 (.019)</b>  | <b>11.602</b> | <b>&lt; .001</b> | <b>.185</b>    | <b>.260</b>  |
| PACS-R                                             | .015 (.030)         | 0.509         | .611             | -.043        | .073         |                | .021 (.029)         | 0.704         | .482             | -.037          | .078         |
| BEECOM (Body)                                      | .049 (.036)         | 1.361         | .174             | -.022        | .119         |                | .042 (.032)         | 1.304         | .192             | -.021          | .106         |
| BEECOM (Eating)                                    | <b>.187 (.035)</b>  | <b>5.329</b>  | <b>&lt; .001</b> | <b>.118</b>  | <b>.256</b>  |                | <b>.200 (.033)</b>  | <b>6.092</b>  | <b>&lt; .001</b> | <b>.136</b>    | <b>.265</b>  |
| BEECOM (Exercise)                                  | <b>.168 (.051)</b>  | <b>3.275</b>  | <b>.001</b>      | <b>.067</b>  | <b>.269</b>  |                | <b>.143 (.048)</b>  | <b>2.979</b>  | <b>.003</b>      | <b>.049</b>    | <b>.237</b>  |
| Younger males vs Younger females (D <sub>1</sub> ) | <b>-.142 (.056)</b> | <b>-2.546</b> | <b>.011</b>      | <b>-.252</b> | <b>-.033</b> |                | <b>-.156 (.056)</b> | <b>-2.777</b> | <b>.006</b>      | <b>-.266</b>   | <b>-.046</b> |
| Older females vs Younger females (D <sub>2</sub> ) | -.092 (.052)        | -1.781        | .075             | -.193        | .009         |                | -.082 (.052)        | -1.593        | .112             | -.184          | .019         |
| Older males vs Younger females (D <sub>3</sub> )   | <b>-.170 (.054)</b> | <b>-3.132</b> | <b>.002</b>      | <b>-.276</b> | <b>-.064</b> |                | <b>-.170 (.054)</b> | <b>-3.165</b> | <b>.002</b>      | <b>-.275</b>   | <b>-.065</b> |
| BEECOM (Exercise) x D <sub>1</sub>                 | <b>-.127 (.059)</b> | <b>-2.160</b> | <b>.031</b>      | <b>-.242</b> | <b>-.012</b> |                | <b>-.127 (.060)</b> | <b>-2.126</b> | <b>.034</b>      | <b>-.244</b>   | <b>-.010</b> |
| BEECOM (Exercise) x D <sub>2</sub>                 | <b>-.114 (.056)</b> | <b>-2.034</b> | <b>.042</b>      | <b>-.225</b> | <b>-.004</b> |                | -.092 (.056)        | -1.656        | .098             | -.202          | .017         |
| BEECOM (Exercise) x D <sub>3</sub>                 | -.119 (.063)        | -1.877        | .061             | -.243        | .005         |                | -.100 (.065)        | -1.551        | .121             | -.227          | .027         |

*Note.*  $\beta$  = Standardized regression coefficients; *SE* = Standard error; CI = Confidence interval;  $R^2$  = Explained Variance;  $\Delta R^2$  =  $R^2$  increase due to interaction; ED = Eating Disorders; BEECOM = Body, Eating, and Exercise Comparison Orientation Measure (-L = long version, -S = short version); LLCI, lower limit 95% bootstrap confidence interval; ULCI, upper limit 95% bootstrap confidence interval; PACS-R = Physical Appearance Comparison Scale-Revised.
